# Supplementary material for: Bovine astrovirus and its role in lymphocytic encephalitis in cattle in Ontario, Canada, 1988–2019
Source: PubMed Central journal article supplement — J Vet Diagn Invest. 2024 Mar 18;36(3):447–56. doi: 10.1177/10406387241237192 (PMC11110778; doi:10.1177/10406387241237192), 2024-03-18
Supplement: sj-pdf-1-vdi-10.1177_10406387241237192.pdf [file sj-pdf-1-vdi-10.1177_10406387241237192.pdf]

**Supplemental Table 1.** Primer and probe sequences for viral PCR assays designed in-house.

| Oligonucleotide name  | Target          | Sequence 5'–3'                   | Final concentration, $\mu$ M |
|-----------------------|-----------------|----------------------------------|------------------------------|
| BoAstV_ORF2_191119-F  | ORF2            | GTTTGAATGCCTGCGTAGC              | 0.50                         |
| BoAstV_ORF2_191119-R  | ORF2            | CCTGTACCCTCGATCCTACT             | 0.50                         |
| BoAstV_ORF2_191119-Pr | ORF2            | FAM/AARTCTATGAGGGCGTGCGYGG       | 0.25                         |
| BoAstV_CH15-F         | ORF2            | CTTAGAGGCCACGCAGAAG              | 0.50                         |
| BoAstV_CH15-R         | ORF2            | CCTGTACCCTCGATCCTACTC            | 0.50                         |
| BoAstV_CH15-Pr        | ORF2            | HEX/CGGTTGCCGTAGTGAAATCAATACAACC | 0.25                         |
| MCF_gB2_210901_F      | <i>gB2</i> gene | ATCGTGCTGAACCTGAC                | 0.50                         |
| MCF_gB2_210901_R      | <i>gB2</i> gene | AGTTGTACTCCCTGAACAT              | 0.50                         |
| MCF_gB2_210901_Pr     | <i>gB2</i> gene | FAM/AAGCGCATGAGCACGGT            | 0.25                         |
| BoAHV1_140118-F       | <i>gB</i> gene  | GCACACGACGGACGATG                | 0.50                         |
| BoAHV1_140118-R       | <i>gB</i> gene  | TCCACTTCTTCCACGATGC              | 0.50                         |
| BoAHV1_140118-Pr      | <i>gB</i> gene  | FAM/CACGGGCACCTCTGTGAAC          | 0.25                         |
| BPIV3_P_140118-F      | <i>P</i> gene   | AGGACACAGAAGAGAGCAC              | 0.50                         |
| BPIV3_P_140118-R      | <i>P</i> gene   | AGGACATTCCGCCACACA               | 0.50                         |
| BPIV3_P_140118-Pr     | <i>P</i> gene   | HEX/TCTTGGTGTAATCCAATCTGCAGCA    | 0.25                         |
| BRSV_N_140118-F       | <i>N</i> gene   | TCAACTAGAGGAGGTAGTAGGGT          | 0.50                         |
| BRSV_N_140118-R       | <i>N</i> gene   | GCTGGCATGACCAAGCATAA             | 0.50                         |
| BRSV_N_140118-Pr      | <i>N</i> gene   | TexRd/TGCATATGGAGCAGGTCAAGTGATGT | 0.25                         |
| Entero_31_For         | 5'-UTR          | ATGCGGCTAATCCCAACCT              | 0.20                         |
| Entero_31_Rev         | 5'-UTR          | CGTTACGACAGGCCAATCACT            | 0.20                         |
| Entero_LNA_probe      | 5'-UTR          | Cy5/CA+G+GTGGTCA+C+AAAC          | 0.06                         |

BoAHV1 = bovine alphaherpesvirus 1; BoAstV = bovine astrovirus; BPIV3 = bovine parainfluenza virus 3; BRSV = bovine respiratory syncytial virus; Entero = enterovirus (internal control PCR); MCF = malignant catarrhal fever (ovine gammaherpesvirus 2).

**Supplemental Table 2.** Cycling parameters for viral PCR assays.

| Step                  | Temperature, °C | Hold, min | Ramp, °C/s | Cycles, X |
|-----------------------|-----------------|-----------|------------|-----------|
| Reverse transcription | 45              | 10:00     | 4.4        | 1         |
| Activation            | 95              | 10:00     | 4.4        | 1         |
| Denaturation          | 94              | 0:05      | 2.2        | 45        |
| Annealing/extension   | 60              | 1:00      | 2.2        | 45        |
| Cool                  | 40              | 10:00     | 2.2        | 1         |

**Supplemental Table 3.** Primers and probe for the *Listeria monocytogenes* qPCR assay.

| Name           | Sequence 5'–3'                   |
|----------------|----------------------------------|
| Forward primer | CGGCGCACCTAACCAAGTAA             |
| Reverse primer | CAGTCTGGACAATCTCTTTGAATTTT       |
| Probe (FAM)    | TCAAGATGACTACAATGGTCCGAGTGTGAAAA |

**Supplemental Table 4.** Reaction conditions for the *Listeria monocytogenes* qPCR assay.

| Program  | Cycles | Target temperature, °C | Time   | Temperature transition, °C/s | Acquisition mode |
|----------|--------|------------------------|--------|------------------------------|------------------|
| Denature | 1      | 95                     | 2 min  | 4.8                          | None             |
| PCR      | 45     | 95                     | 5 sec  | 4.8                          | None             |
|          |        | 60                     | 30 sec | 2.5                          | Single           |
| Cool     | 1      | 40                     | 10 sec | 2.5                          | None             |

**Supplemental Table 5.** Data for all animals in the study.

| Group | Year | Age   | Sex | BoAstV | RABV | BVDV | WNV | EEEV | OvGHV2 | BoAHV1 | Listeria | Chlam | BCoV | BAdV |
|-------|------|-------|-----|--------|------|------|-----|------|--------|--------|----------|-------|------|------|
| LE    | 1990 | 12 mo | M   | 1      | 0    | 1    | 0   | 0    | 0      | 0      | 0        | 0     | 0    | 0    |
| LE    | 1990 | 15 mo | F   | 1      | 0    | 0    | 0   | 1    | 0      | 0      | 0        | 0     | 0    | 0    |
| LE    | 1994 | 12 mo | F   | 1      | 0    | 0    | 0   | 0    | 0      | 0      | 0        | 0     | 0    | 0    |
| LE    | 1995 | 5 y   | F   | 1      | 0    | 0    | 0   | 0    | 0      | 0      | 0        | 0     | 1    | 0    |
| LE    | 1995 | 16 mo | F   | 1      | 0    | 0    | 0   | 0    | 0      | 0      | 0        | 0     | 1    | 0    |
| LE    | 1996 | 12 mo | M   | 1      | 0    | 0    | 0   | 0    | 0      | 0      | 0        | 0     | 0    | 0    |
| LE    | 1996 | 15 mo | F   | 1      | 0    | 0    | 0   | 0    | 0      | 0      | 0        | 0     | 1    | 0    |
| LE    | 1996 | Adult | F   | 0      | 0    | 0    | 0   | 0    | 0      | 0      | 0        | 0     | 0    | 0    |
| LE    | 1996 | 6 y   | F   | 0      | 0    | 0    | 0   | 0    | 0      | 0      | 0        | 0     | 0    | 0    |
| LE    | 1997 | Adult | NS  | 0      | 0    | 0    | 0   | 0    | 0      | 0      | 0        | 0     | 0    | 0    |
| LE    | 2014 | 7 mo  | M   | 1      | 0    | 0    | 0   | 0    | 0      | 0      | 0        | 0     | 0    | 0    |
| LE    | 2016 | 2 y   | M   | 1      | 0    | 0    | 0   | 0    | 0      | 0      | 0        | 0     | 0    | 0    |
| LE    | 2016 | 12 mo | M   | 1      | 0    | 0    | 0   | 0    | 0      | 0      | 0        | 0     | 1    | 0    |
| LE    | 2017 | 7 y   | F   | 1      | 0    | 0    | 0   | 0    | 0      | 0      | 0        | 0     | 1    | 0    |
| LE    | 2012 | 20 mo | M   | 0      | 0    | 0    | 0   | 0    | 0      | 0      | 0        | 0     | 0    | 0    |
| LE    | 2009 | 8 y   | F   | 0      | 0    | 0    | 0   | 0    | 0      | 0      | 0        | 0     | 0    | 0    |
| LE    | 2003 | Adult | NA  | 0      | 0    | 0    | 0   | 0    | 0      | 0      | 0        | 0     | 0    | 0    |
| LE    | 2004 | 1.5 y | NA  | 0      | 0    | 0    | 0   | 0    | 0      | 0      | 0        | 0     | 0    | 0    |
| LE    | 2002 | Adult | NA  | 0      | 0    | 0    | 0   | 0    | 0      | 0      | 0        | 0     | 0    | 0    |
| LE    | 2002 | Adult | NA  | 0      | 0    | 0    | 0   | 0    | 0      | 0      | 0        | 0     | 0    | 0    |
| LE    | 2002 | Adult | NA  | 0      | 0    | 1    | 0   | 0    | 0      | 0      | 0        | 0     | 0    | 0    |
| LE    | 2002 | Adult | NA  | 0      | 0    | 0    | 0   | 0    | 0      | 0      | 0        | 0     | 0    | 0    |
| LE    | 2002 | Adult | M   | 0      | 0    | 0    | 0   | 0    | 0      | 0      | 0        | 0     | 0    | 0    |
| LE    | 2002 | Adult | F   | 0      | 0    | 0    | 0   | 0    | 0      | 0      | 0        | 0     | 0    | 0    |
| LE    | 2002 | Adult | M   | 0      | 0    | 0    | 0   | 0    | 0      | 0      | 0        | 0     | 0    | 0    |

| Group | Year | Age   | Sex | BoAstV | RABV | BVDV | WNV | EEEV | OvGHV2 | BoAHV1 | Listeria | Chlam | BCoV | BAdV |
|-------|------|-------|-----|--------|------|------|-----|------|--------|--------|----------|-------|------|------|
| LE    | 2002 | Adult | NA  | 0      | 0    | 0    | 0   | 0    | 0      | 0      | 0        | 0     | 0    | 0    |
| LE    | 2001 | Adult | NA  | 0      | 0    | 1    | 0   | 0    | 0      | 0      | 0        | 0     | 0    | 0    |
| LE    | 2001 | 4 mo  | M   | 0      | 0    | 0    | 0   | 0    | 0      | 1      | 0        | 0     | 0    | 0    |
| LE    | 2001 | Adult | NA  | 0      | 0    | 0    | 0   | 0    | 0      | 0      | 0        | 0     | 0    | 0    |
| LE    | 2007 | 1 y   | M   | 0      | 0    | 0    | 0   | 0    | 0      | 0      | 0        | 0     | 0    | 0    |
| LE    | 2008 | 8 mo  | F   | 0      | 0    | 0    | 0   | 0    | 0      | 0      | 0        | 0     | 0    | 0    |
| LE    | 2009 | 7 mo  | M   | 0      | 0    | 0    | 0   | 0    | 0      | 0      | 0        | 0     | 0    | 0    |
| LE    | 2010 | Adult | M   | 0      | 0    | 0    | 0   | 0    | 0      | 0      | 0        | 0     | 0    | 0    |
| LE    | 2011 | 2 y   | F   | 0      | 0    | 0    | 0   | 0    | 0      | 0      | 0        | 0     | 0    | 0    |
| LE    | 2013 | 10 mo | F   | 0      | 0    | 0    | 0   | 0    | 0      | 0      | 0        | 0     | 0    | 0    |
| LE    | 2012 | 1 y   | M   | 0      | 0    | 0    | 0   | 0    | 0      | 0      | 0        | 0     | 0    | 0    |
| LE    | 2014 | 1 y   | M   | 0      | 0    | 0    | 0   | 0    | 0      | 0      | 0        | 0     | 0    | 0    |
| LE    | 2014 | 10 mo | M   | 0      | 0    | 0    | 0   | 0    | 1      | 0      | 0        | 0     | 0    | 0    |
| LE    | 2010 | 1 y   | F   | 0      | 0    | 0    | 0   | 0    | 0      | 0      | 0        | 0     | 0    | 0    |
| LE    | 2012 | 6 mo  | F   | 0      | 0    | 0    | 0   | 0    | 0      | 0      | 0        | 0     | 0    | 0    |
| LE    | 2015 | 8 y   | F   | 0      | 0    | 0    | 0   | 0    | 0      | 0      | 0        | 0     | 0    | 0    |
| LE    | 2017 | 5 y   | F   | 0      | 0    | 0    | 0   | 0    | 0      | 0      | 0        | 0     | 0    | 0    |
| LE    | 2019 | 4 y   | F   | 0      | 0    | 0    | 0   | 0    | 0      | 0      | 0        | 0     | 0    | 0    |
| LE    | 2019 | 3 y   | M   | 0      | 0    | 0    | 0   | 0    | 0      | 0      | 0        | 0     | 0    | 0    |
| LE    | 2019 | 2 y   | F   | 0      | 0    | 0    | 0   | 0    | 0      | 0      | 0        | 0     | 0    | 0    |
| LE    | 1991 | 2 y   | F   | 0      | 0    | 0    | 0   | 1    | 0      | 0      | 0        | 0     | 0    | 1    |
| LE    | 1992 | 2 y   | F   | 0      | 0    | 0    | 0   | 1    | 0      | 0      | 1        | 0     | 1    | 0    |
| LE    | 1992 | 6 mo  | F   | 0      | 0    | 0    | 0   | 0    | 0      | 0      | 0        | 0     | 0    | 0    |
| LE    | 1993 | 6 mo  | M   | 0      | 0    | 1    | 0   | 0    | 0      | 0      | 0        | 0     | 0    | 0    |
| LE    | 1993 | Adult | F   | 0      | 0    | 0    | 0   | 0    | 0      | 0      | 1        | 0     | 0    | 0    |
| LE    | 1993 | 2 y   | F   | 0      | 0    | 0    | 0   | 0    | 0      | 0      | 0        | 0     | 0    | 0    |
| LE    | 1995 | 5 y   | F   | 0      | 0    | 0    | 0   | 0    | 0      | 0      | 0        | 0     | 0    | 0    |

| Group | Year | Age   | Sex | BoAstV | RABV | BVDV | WNV | EEEV | OvGHV2 | BoAHV1 | Listeria | Chlam | BCoV | BAdV |
|-------|------|-------|-----|--------|------|------|-----|------|--------|--------|----------|-------|------|------|
| LE    | 1996 | Adult | F   | 0      | 0    | 0    | 0   | 0    | 0      | 0      | 0        | 0     | 1    | 0    |
| LE    | 1996 | 9 y   | F   | 0      | 0    | 0    | 0   | 0    | 0      | 0      | 0        | 0     | 0    | 0    |
| LE    | 1998 | Adult | F   | 0      | 0    | 0    | 0   | 1    | 0      | 0      | 0        | 0     | 0    | 0    |
| LE    | 1996 | 6 y   | F   | 0      | 0    | 0    | 0   | 0    | 0      | 0      | 0        | 0     | 0    | 0    |
| OE    | 2012 | 2 y   | M   | 0      | ND   | ND   | ND  | ND   | ND     | ND     | ND       | ND    | ND   | ND   |
| OE    | 2019 | Adult | NA  | 0      | ND   | ND   | ND  | ND   | ND     | ND     | ND       | ND    | ND   | ND   |
| OE    | 2018 | 9 mo  | NA  | 0      | ND   | ND   | ND  | ND   | ND     | ND     | ND       | ND    | ND   | ND   |
| OE    | 2018 | 1 y   | F   | 0      | ND   | ND   | ND  | ND   | ND     | ND     | ND       | ND    | ND   | ND   |
| OE    | 2017 | 5 y   | NA  | 0      | ND   | ND   | ND  | ND   | ND     | ND     | ND       | ND    | ND   | ND   |
| OE    | 2017 | 7 mo  | M   | 0      | ND   | ND   | ND  | ND   | ND     | ND     | ND       | ND    | ND   | ND   |
| OE    | 2016 | 6 mo  | M   | 0      | ND   | ND   | ND  | ND   | ND     | ND     | ND       | ND    | ND   | ND   |
| OE    | 2014 | 1 y   | F   | 0      | ND   | ND   | ND  | ND   | ND     | ND     | ND       | ND    | ND   | ND   |
| OE    | 2014 | 7 mo  | M   | 0      | ND   | ND   | ND  | ND   | ND     | ND     | ND       | ND    | ND   | ND   |
| OE    | 2014 | 9 mo  | M   | 0      | ND   | ND   | ND  | ND   | ND     | ND     | ND       | ND    | ND   | ND   |
| OE    | 2014 | 1 y   | M   | 0      | ND   | ND   | ND  | ND   | ND     | ND     | ND       | ND    | ND   | ND   |
| OE    | 2014 | 1 y   | M   | 0      | ND   | ND   | ND  | ND   | ND     | ND     | ND       | ND    | ND   | ND   |
| OE    | 2001 | 7 mo  | F   | 0      | ND   | ND   | ND  | ND   | ND     | ND     | ND       | ND    | ND   | ND   |
| OE    | 2001 | Adult | F   | 0      | ND   | ND   | ND  | ND   | ND     | ND     | ND       | ND    | ND   | ND   |
| OE    | 2002 | Adult | NA  | 0      | ND   | ND   | ND  | ND   | ND     | ND     | ND       | ND    | ND   | ND   |
| OE    | 2002 | Adult | M   | 0      | ND   | ND   | ND  | ND   | ND     | ND     | ND       | ND    | ND   | ND   |
| OE    | 2002 | Adult | NA  | 0      | ND   | ND   | ND  | ND   | ND     | ND     | ND       | ND    | ND   | ND   |
| OE    | 2004 | 6 mo  | M   | 0      | ND   | ND   | ND  | ND   | ND     | ND     | ND       | ND    | ND   | ND   |
| OE    | 2013 | 6 y   | F   | 0      | ND   | ND   | ND  | ND   | ND     | ND     | ND       | ND    | ND   | ND   |
| OE    | 2012 | 9 mo  | NA  | 0      | ND   | ND   | ND  | ND   | ND     | ND     | ND       | ND    | ND   | ND   |
| OE    | 1998 | 9 mo  | M   | 0      | ND   | ND   | ND  | ND   | ND     | ND     | ND       | ND    | ND   | ND   |
| OE    | 2002 | 7 y   | F   | 0      | ND   | ND   | ND  | ND   | ND     | ND     | ND       | ND    | ND   | ND   |
| OE    | 2002 | Adult | NA  | 0      | ND   | ND   | ND  | ND   | ND     | ND     | ND       | ND    | ND   | ND   |

| Group | Year | Age   | Sex | BoAstV | RABV | BVDV | WNV | EEEV | OvGHV2 | BoAHV1 | Listeria | Chlam | BCoV | BAdV |
|-------|------|-------|-----|--------|------|------|-----|------|--------|--------|----------|-------|------|------|
| OE    | 2003 | Adult | NA  | 0      | ND   | ND   | ND  | ND   | ND     | ND     | ND       | ND    | ND   | ND   |
| OE    | 2004 | 1.5 y | F   | 0      | ND   | ND   | ND  | ND   | ND     | ND     | ND       | ND    | ND   | ND   |
| OE    | 2008 | 5 y   | F   | 0      | ND   | ND   | ND  | ND   | ND     | ND     | ND       | ND    | ND   | ND   |
| OE    | 2009 | 10 mo | M   | 0      | ND   | ND   | ND  | ND   | ND     | ND     | ND       | ND    | ND   | ND   |
| OE    | 2010 | 1 y   | F   | 0      | ND   | ND   | ND  | ND   | ND     | ND     | ND       | ND    | ND   | ND   |
| OE    | 2011 | 2 y   | F   | 0      | ND   | ND   | ND  | ND   | ND     | ND     | ND       | ND    | ND   | ND   |
| OE    | 2012 | 8 mo  | M   | 0      | ND   | ND   | ND  | ND   | ND     | ND     | ND       | ND    | ND   | ND   |
| OE    | 2008 | 4 y   | F   | 0      | ND   | ND   | ND  | ND   | ND     | ND     | ND       | ND    | ND   | ND   |
| OE    | 2009 | 7 mo  | F   | 0      | ND   | ND   | ND  | ND   | ND     | ND     | ND       | ND    | ND   | ND   |
| NE    | 2009 | 11 mo | F   | 0      | ND   | ND   | ND  | ND   | ND     | ND     | ND       | ND    | ND   | ND   |
| NE    | 2009 | 7 mo  | F   | 0      | ND   | ND   | ND  | ND   | ND     | ND     | ND       | ND    | ND   | ND   |
| NE    | 2009 | 5 y   | F   | 0      | ND   | ND   | ND  | ND   | ND     | ND     | ND       | ND    | ND   | ND   |
| NE    | 2009 | Adult | F   | 0      | ND   | ND   | ND  | ND   | ND     | ND     | ND       | ND    | ND   | ND   |
| NE    | 2009 | 7 y   | F   | 0      | ND   | ND   | ND  | ND   | ND     | ND     | ND       | ND    | ND   | ND   |
| NE    | 2010 | 5 y   | F   | 0      | ND   | ND   | ND  | ND   | ND     | ND     | ND       | ND    | ND   | ND   |
| NE    | 2010 | Adult | F   | 0      | ND   | ND   | ND  | ND   | ND     | ND     | ND       | ND    | ND   | ND   |
| NE    | 2010 | 7 mo  | F   | 0      | ND   | ND   | ND  | ND   | ND     | ND     | ND       | ND    | ND   | ND   |
| NE    | 2010 | 7 y   | F   | 0      | ND   | ND   | ND  | ND   | ND     | ND     | ND       | ND    | ND   | ND   |
| NE    | 2011 | 2 y   | F   | 0      | ND   | ND   | ND  | ND   | ND     | ND     | ND       | ND    | ND   | ND   |
| NE    | 1999 | Adult | F   | 0      | ND   | ND   | ND  | ND   | ND     | ND     | ND       | ND    | ND   | ND   |
| NE    | 2001 | Adult | M   | 0      | ND   | ND   | ND  | ND   | ND     | ND     | ND       | ND    | ND   | ND   |
| NE    | 2001 | Adult | F   | 0      | ND   | ND   | ND  | ND   | ND     | ND     | ND       | ND    | ND   | ND   |
| NE    | 2002 | Adult | F   | 0      | ND   | ND   | ND  | ND   | ND     | ND     | ND       | ND    | ND   | ND   |
| NE    | 2002 | 6 mo  | M   | 0      | ND   | ND   | ND  | ND   | ND     | ND     | ND       | ND    | ND   | ND   |
| NE    | 2002 | Adult | M   | 0      | ND   | ND   | ND  | ND   | ND     | ND     | ND       | ND    | ND   | ND   |
| NE    | 2003 | 11 mo | M   | 0      | ND   | ND   | ND  | ND   | ND     | ND     | ND       | ND    | ND   | ND   |
| NE    | 2004 | 2 y   | M   | 0      | ND   | ND   | ND  | ND   | ND     | ND     | ND       | ND    | ND   | ND   |

| Group | Year | Age   | Sex | BoAstV | RABV | BVDV | WNV | EEEV | OvGHV2 | BoAHV1 | Listeria | Chlam | BCoV | BAdV |
|-------|------|-------|-----|--------|------|------|-----|------|--------|--------|----------|-------|------|------|
| NE    | 2004 | 1 y   | F   | 0      | ND   | ND   | ND  | ND   | ND     | ND     | ND       | ND    | ND   | ND   |
| NE    | 2005 | 6 mo  | F   | 0      | ND   | ND   | ND  | ND   | ND     | ND     | ND       | ND    | ND   | ND   |
| NE    | 2006 | 1 y   | F   | 0      | ND   | ND   | ND  | ND   | ND     | ND     | ND       | ND    | ND   | ND   |
| NE    | 2006 | 13 y  | F   | 0      | ND   | ND   | ND  | ND   | ND     | ND     | ND       | ND    | ND   | ND   |
| NE    | 2007 | 3 y   | F   | 0      | ND   | ND   | ND  | ND   | ND     | ND     | ND       | ND    | ND   | ND   |
| NE    | 2008 | 5 y   | F   | 0      | ND   | ND   | ND  | ND   | ND     | ND     | ND       | ND    | ND   | ND   |
| NE    | 2012 | 6 mo  | M   | 0      | ND   | ND   | ND  | ND   | ND     | ND     | ND       | ND    | ND   | ND   |
| NE    | 2012 | 1.5 y | M   | 0      | ND   | ND   | ND  | ND   | ND     | ND     | ND       | ND    | ND   | ND   |
| NE    | 2013 | Adult | F   | 0      | ND   | ND   | ND  | ND   | ND     | ND     | ND       | ND    | ND   | ND   |
| NE    | 2013 | 7 y   | F   | 0      | ND   | ND   | ND  | ND   | ND     | ND     | ND       | ND    | ND   | ND   |
| NE    | 2014 | 6 mo  | F   | 0      | ND   | ND   | ND  | ND   | ND     | ND     | ND       | ND    | ND   | ND   |
| NE    | 2014 | 1 y   | M   | 0      | ND   | ND   | ND  | ND   | ND     | ND     | ND       | ND    | ND   | ND   |
| NE    | 2014 | 10 mo | F   | 0      | ND   | ND   | ND  | ND   | ND     | ND     | ND       | ND    | ND   | ND   |
| NE    | 2015 | 4 y   | F   | 0      | ND   | ND   | ND  | ND   | ND     | ND     | ND       | ND    | ND   | ND   |
| NE    | 2015 | Adult | F   | 0      | ND   | ND   | ND  | ND   | ND     | ND     | ND       | ND    | ND   | ND   |
| NE    | 2015 | 2 y   | F   | 0      | ND   | ND   | ND  | ND   | ND     | ND     | ND       | ND    | ND   | ND   |
| NE    | 2016 | 7 y   | F   | 0      | ND   | ND   | ND  | ND   | ND     | ND     | ND       | ND    | ND   | ND   |
| NE    | 2016 | 3 y   | F   | 0      | ND   | ND   | ND  | ND   | ND     | ND     | ND       | ND    | ND   | ND   |
| NE    | 2017 | 1 y   | M   | 0      | ND   | ND   | ND  | ND   | ND     | ND     | ND       | ND    | ND   | ND   |
| NE    | 2017 | 4 y   | F   | 0      | ND   | ND   | ND  | ND   | ND     | ND     | ND       | ND    | ND   | ND   |
| NE    | 2019 | 2 y   | F   | 0      | ND   | ND   | ND  | ND   | ND     | ND     | ND       | ND    | ND   | ND   |
| NE    | 2019 | 6 y   | F   | 0      | ND   | ND   | ND  | ND   | ND     | ND     | ND       | ND    | ND   | ND   |

BAdV = bovine adenovirus; BoAHV1 = bovine alphaherpesvirus 1; BoAstV = bovine astrovirus CH13/NeuroS1; BVDV = bovine viral diarrhea virus; Chlam = *Chlamydia* spp.; BCoV = bovine coronavirus; EEEV = eastern equine encephalitis virus; F = female; LE = lymphocytic encephalitis; Listeria = *Listeria monocytogenes*; M = male; OE = other forms of encephalitis; OvGHV2 = ovine

herpesvirus 2 (malignant catarrhal fever); NA = not available; ND = not tested; NE = no encephalitis (no brain disease); WNV = West Nile virus.
